# Supplementary material for: Genome-Wide Association Study Identifies Novel Genetic Variants Associated with Widespread Pain in the UK Biobank (N=172,230)
Source: bioRxiv or medRxiv preprint supplement (doi:10.1101/2024.05.16.24307395), 2024-05-16

-log<sub>10</sub> P-value

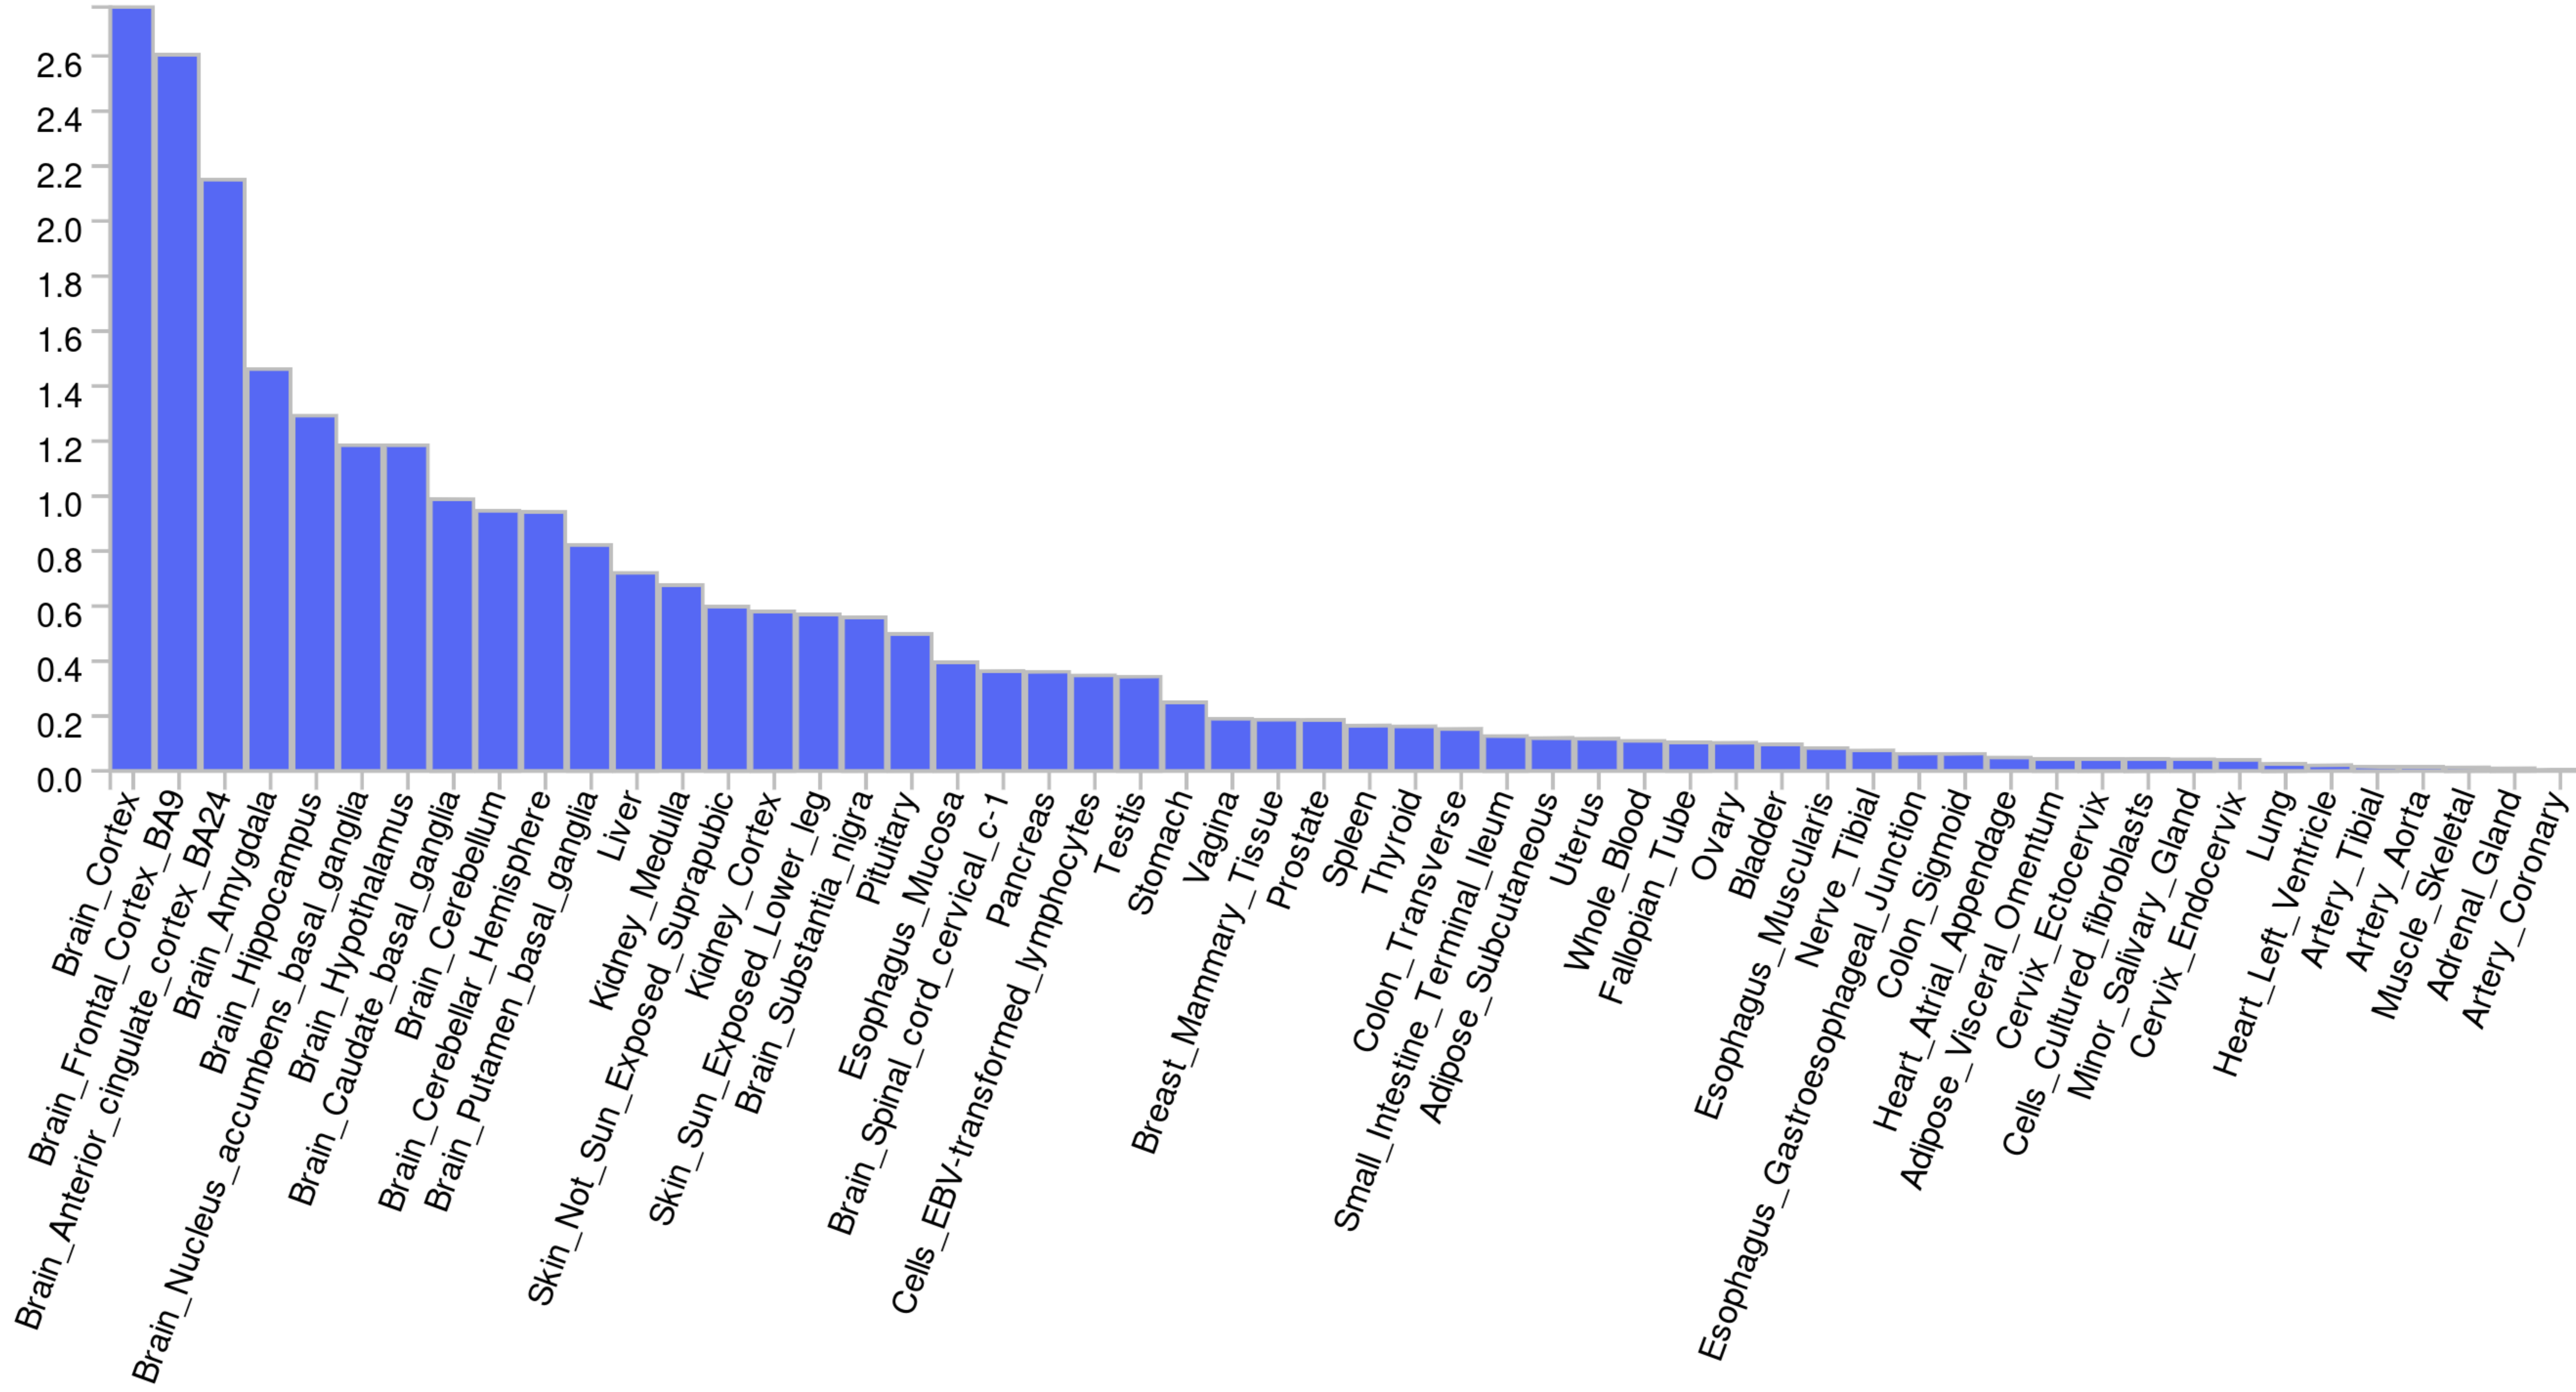

Supplement: Supplementary file [file media-2.pdf]
